# Supplementary material for: Dye-loaded zeolite L @silica core-shell composite functionalized with europium(III) complexes for dipicolinic acid detection
Source: Royal Society of Chemistry journal article supplement (doi:10.1039/c0pp00273a), 2010-11-12
Supplement: c0pp00273a.pdf [file c0pp00273a.pdf]

## Dye-loaded zeolite L @silica core-shell composite functionalized with europium (III) complexes for dipicolinic acid detection

Yige Wang<sup>1</sup>, Yuping Yue<sup>2</sup>, Huanrong Li<sup>1\*</sup>, Qi Zhao<sup>1</sup>, Yi Fang<sup>1</sup> and Pengpeng Cao<sup>1</sup>

5

Supporting information

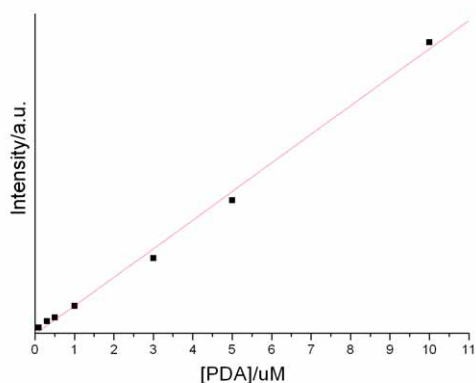

10

Fig. 1S emission intensity at 615 nm of the core-shell composite as a function of DPA concentration

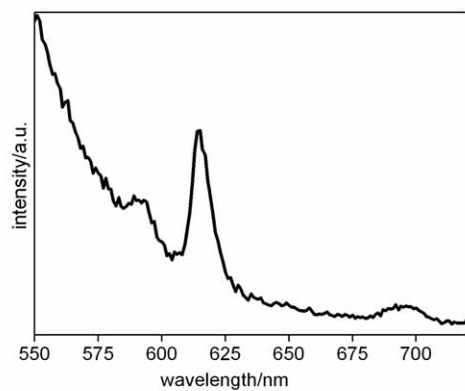

Fig.2S Emission spectrum of the core-shell composites upon addition of 0.05uM of DPA. The excitation wavelength is 273 nm.

15
